# Supplementary material
Source: PubMed Central journal article supplement (PMC7116789)
Supplement: EMS114653-supplement-Supporting_figure_1.pdf [file EMS114653-supplement-Supporting_figure_1.pdf]

Source data for Figure 1b

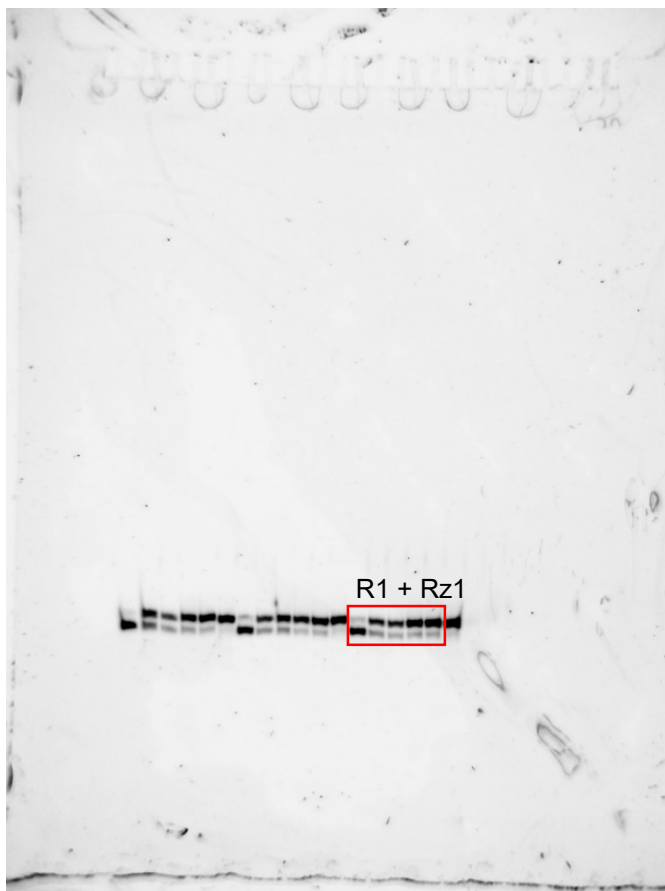

20% PAGE, 20x30 cm, 35W, 2:15 h

Source data for Figure 1b

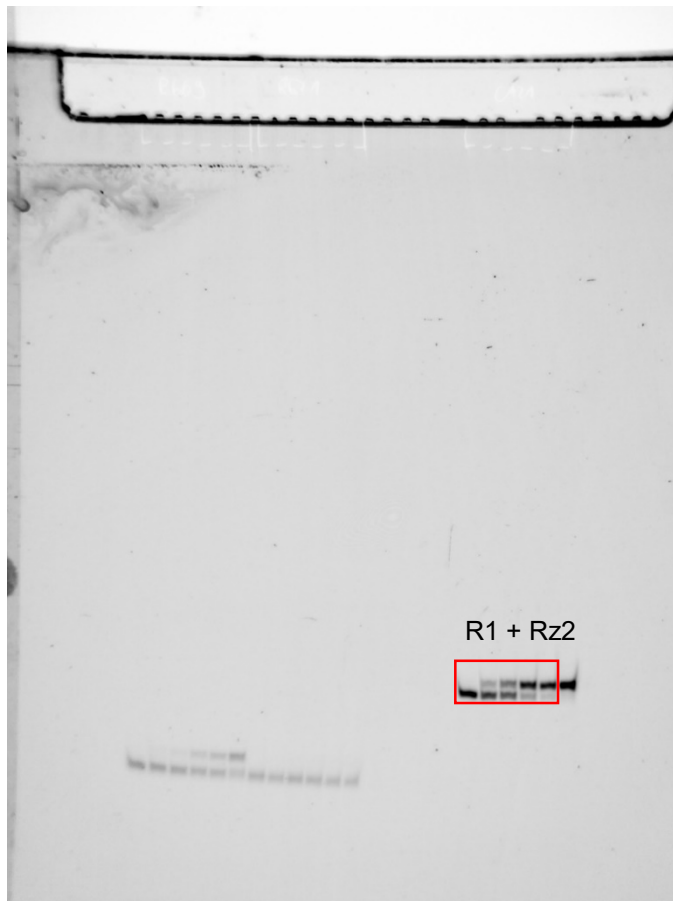

20% PAGE, 20x30 cm, 35W, 2:15 h

Source data for Figure 1b

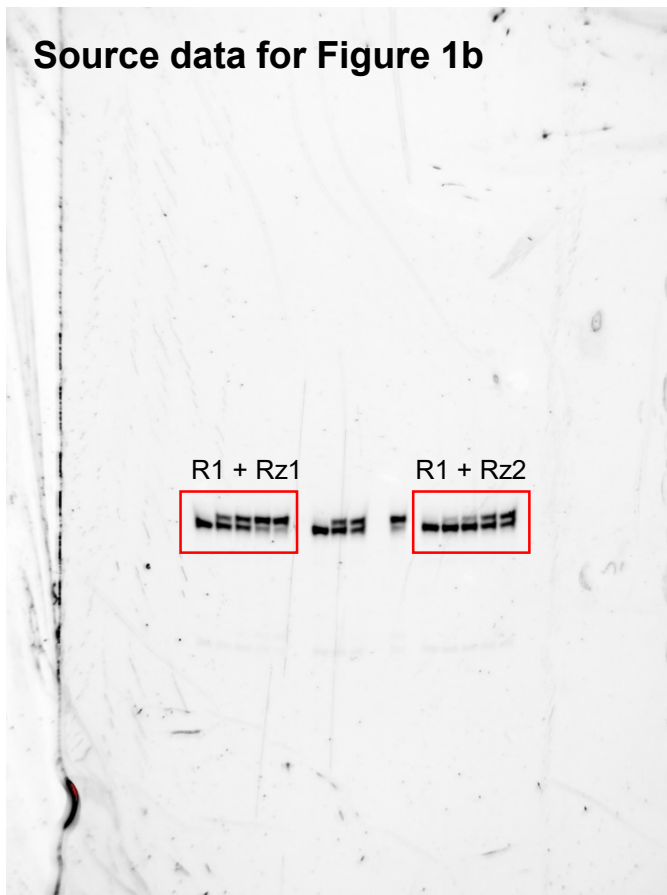

20% PAGE, 20x30 cm, 35W, 2:15 h

Source data for Figure 1c

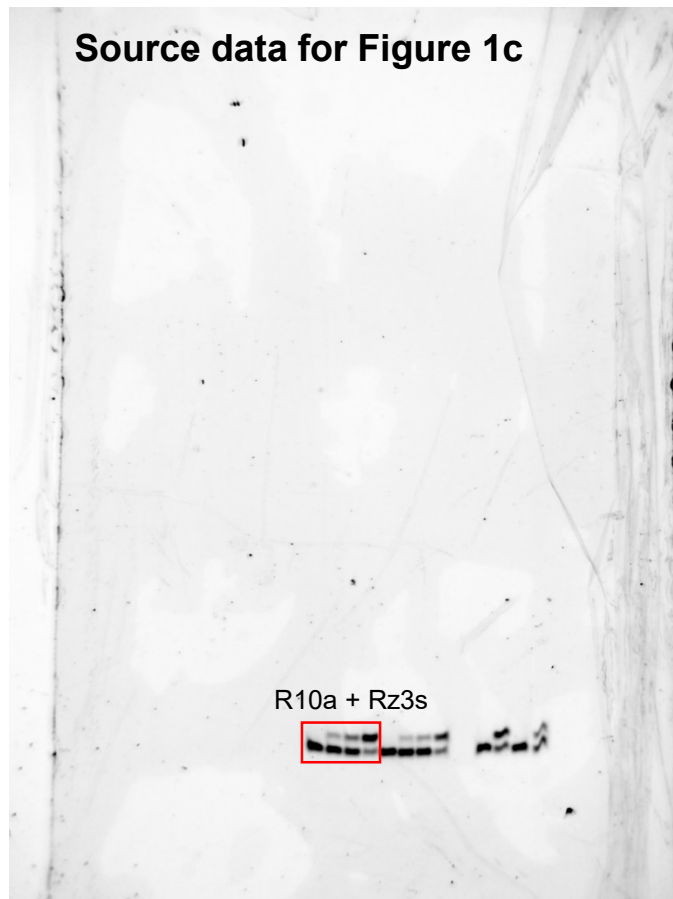

20% PAGE, 20x30 cm, 35W, 2:15 h

## Source data for Figure 1d

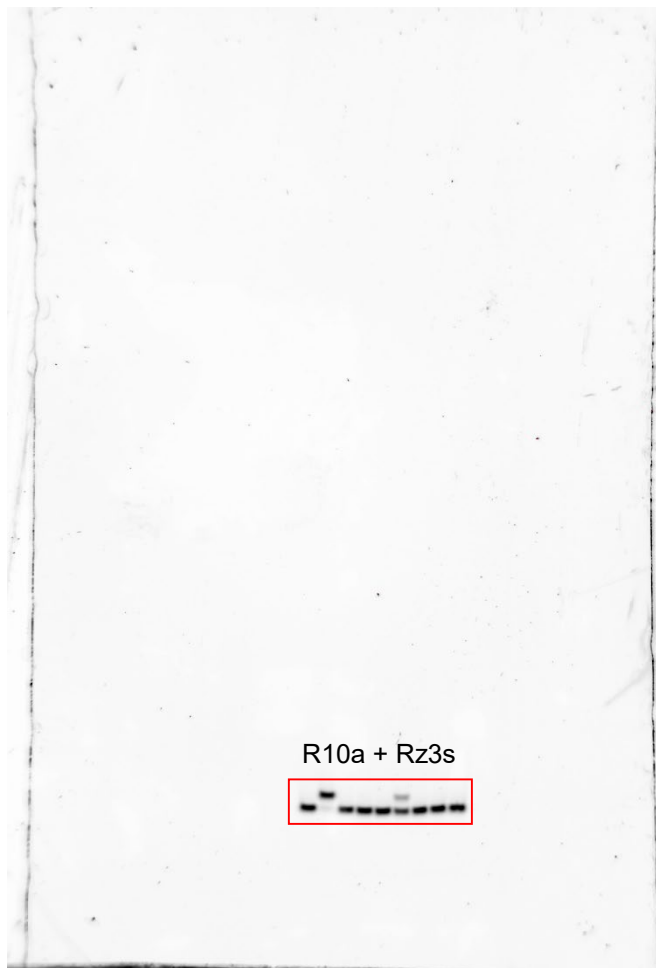

20% PAGE, 20x30 cm, 35W, 2:15 h

## Source data for Figure 2e

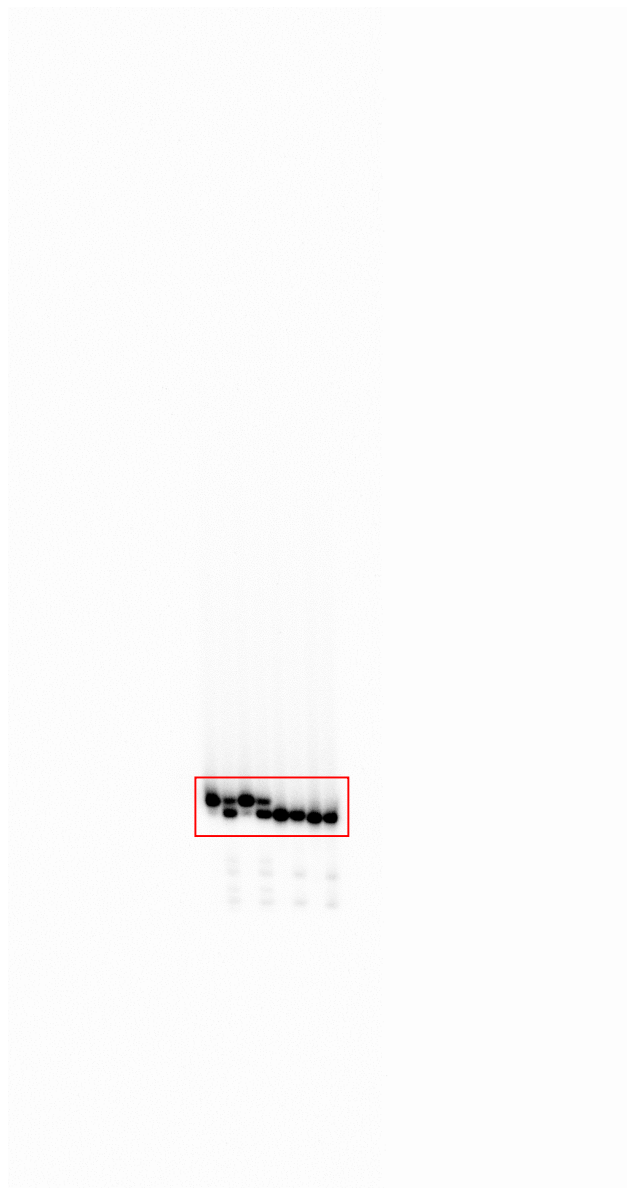

20% PAGE, 20x40 cm, 45W, 2:20 h  
(scan area 20x40 cm, edge of gel not visible)

## Source data for ED Fig 2a

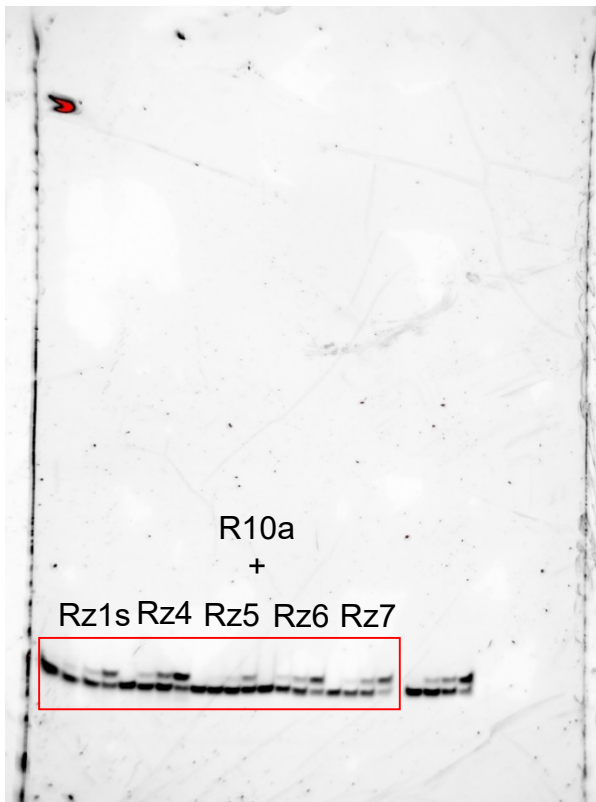

20% PAGE, 20x30 cm, 35W, 2:15 h

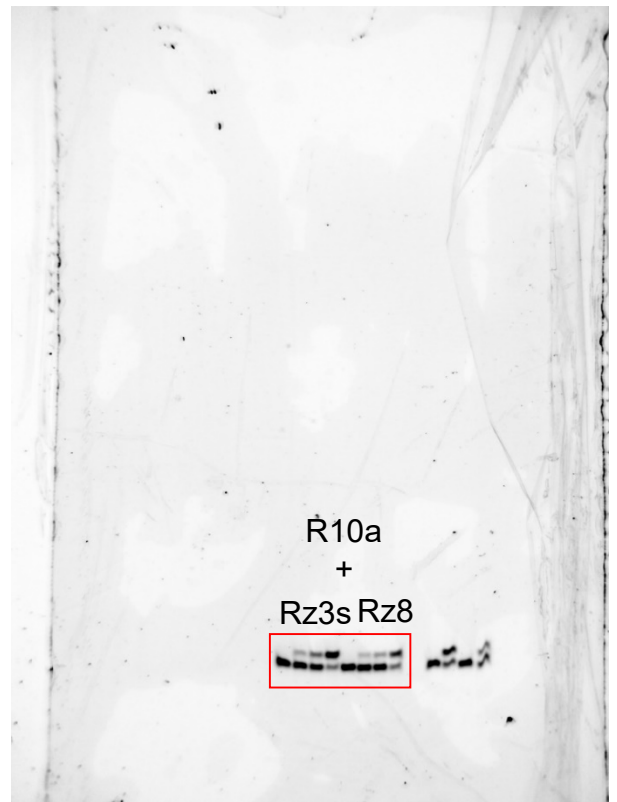

20% PAGE, 20x30 cm, 35W, 2:15 h

## Source data for ED Fig 2b

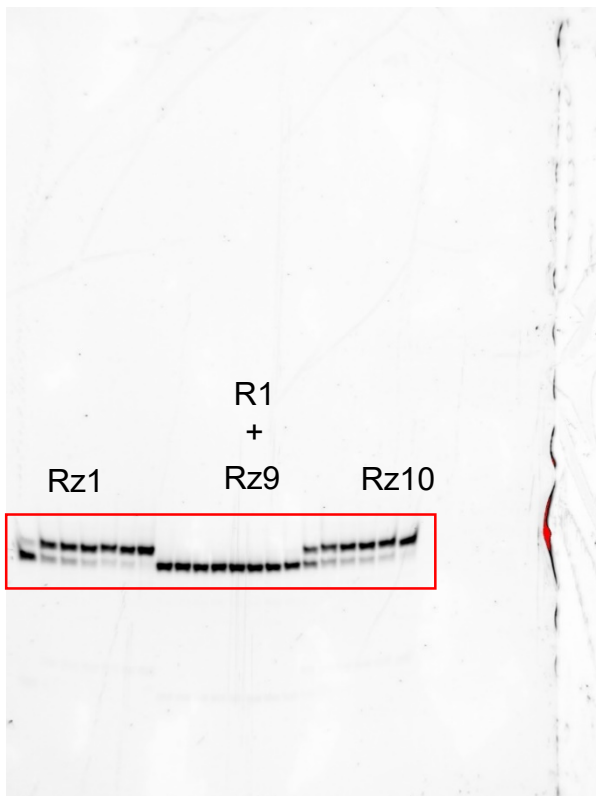

20% PAGE, 20x30 cm, 35W, 2:15 h

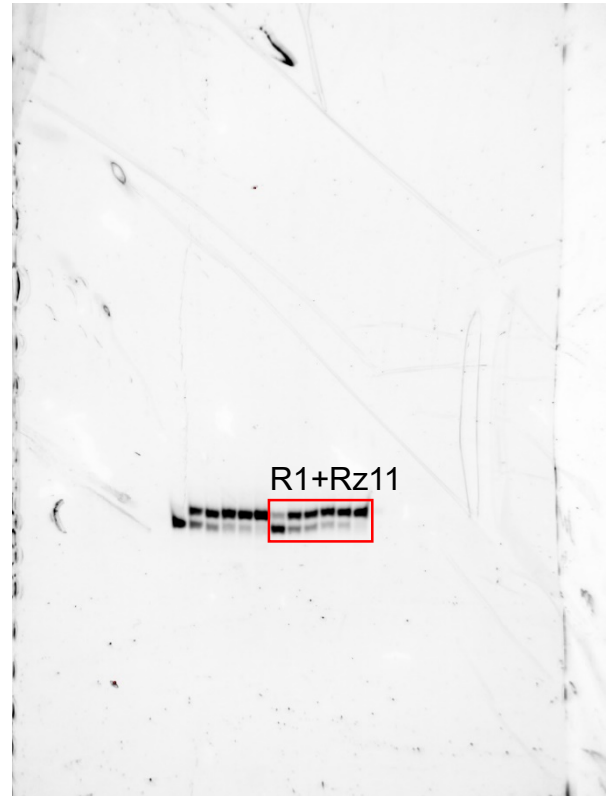

20% PAGE, 20x30 cm, 35W, 2:15 h

Source data for ED Fig 2c

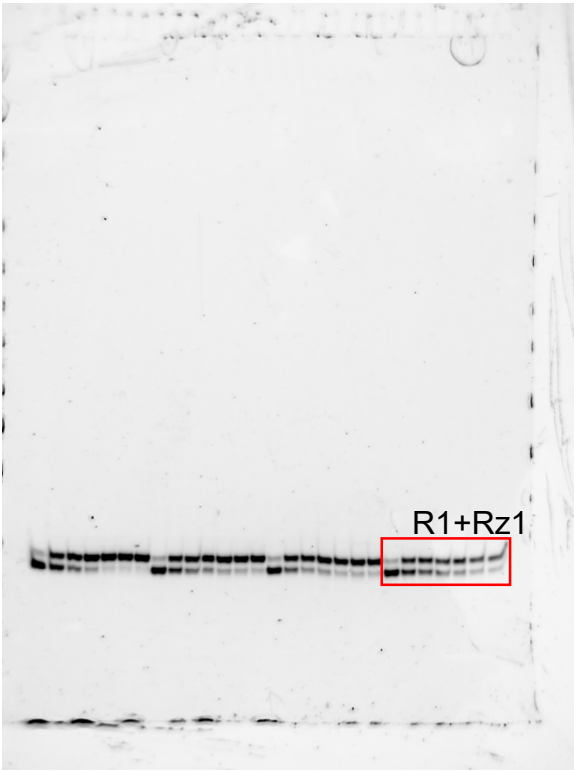

20% PAGE, 20x30 cm, 35W, 2:15 h

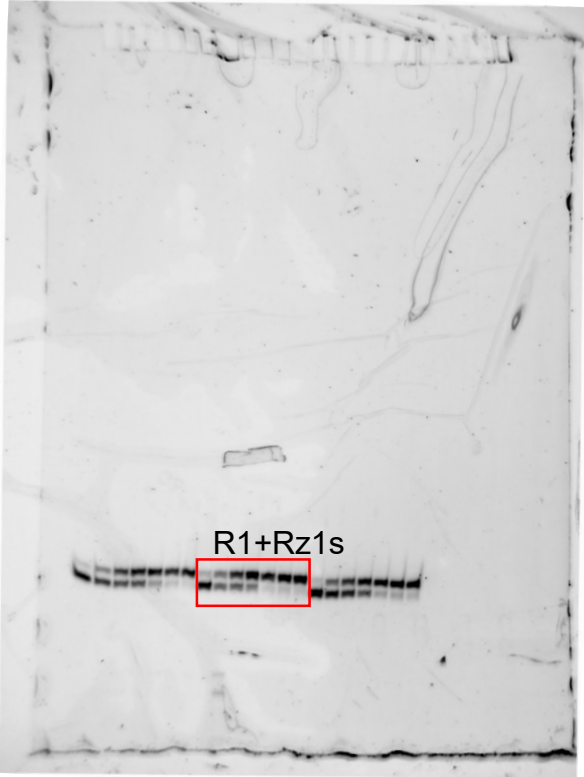

20% PAGE, 20x30 cm, 35W, 2:15 h

# Source data for ED Fig 4: synthetic RNAs (5'-<sup>32</sup>P-labeled)

ED Fig 4a + 4b

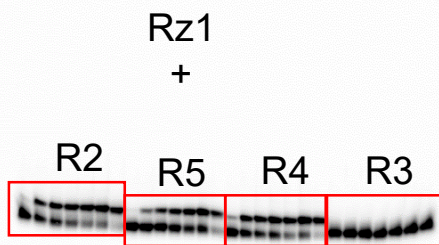

20% PAGE, 20x30 cm, 35W, 2:15 h

ED Fig 4c

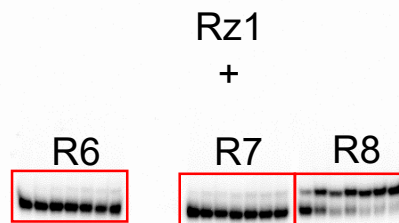

20% PAGE, 20x30 cm, 35W, 2:15 h

ED Fig 4b + 4c

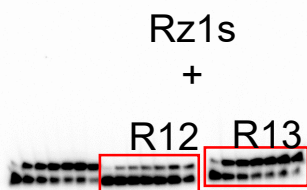

20% PAGE, 20x30 cm, 35W, 1:15 h

ED Fig 4d

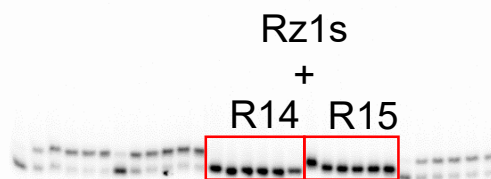

20% PAGE, 20x30 cm, 35W, 1:15 h



# Source data for ED Fig 4: fluorescently labeled RNAs (transcripts)

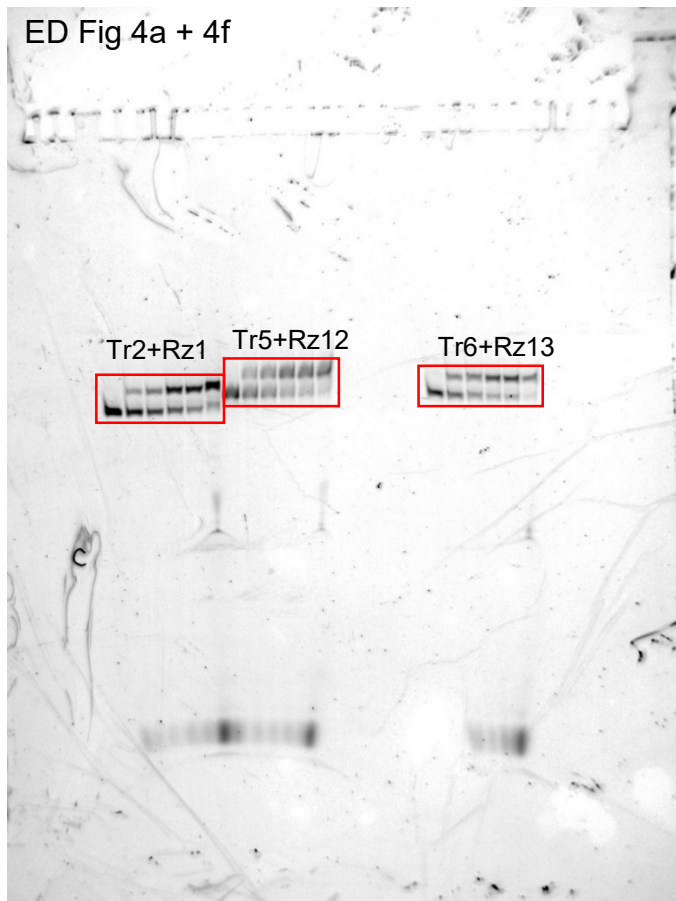

20% PAGE, 20x30 cm, 35W, 1:00 h

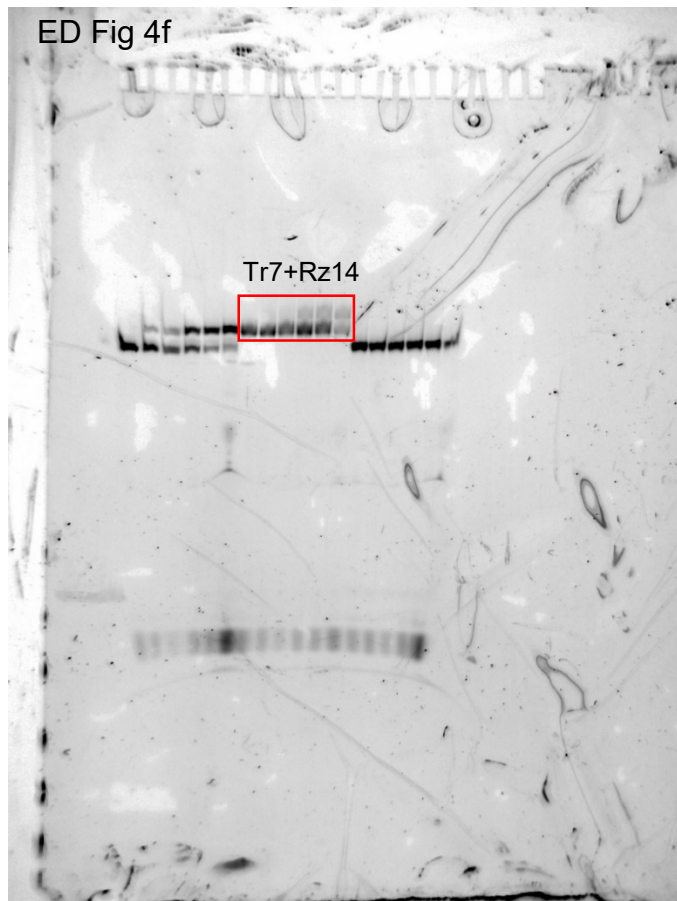

20% PAGE, 20x30 cm, 35W, 1:00 h

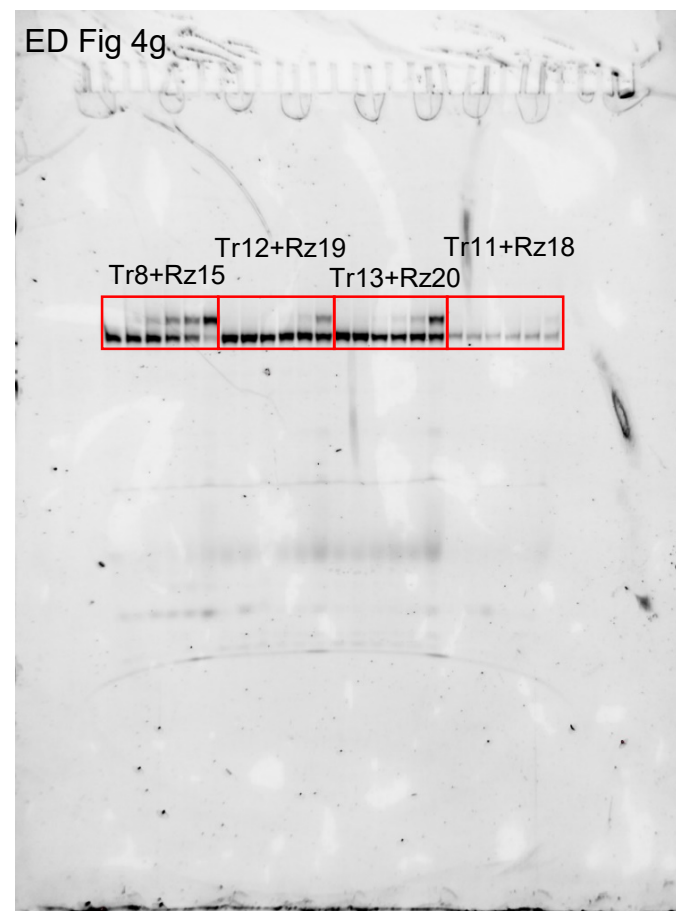

20% PAGE, 20x30 cm, 35W, 1:00 h

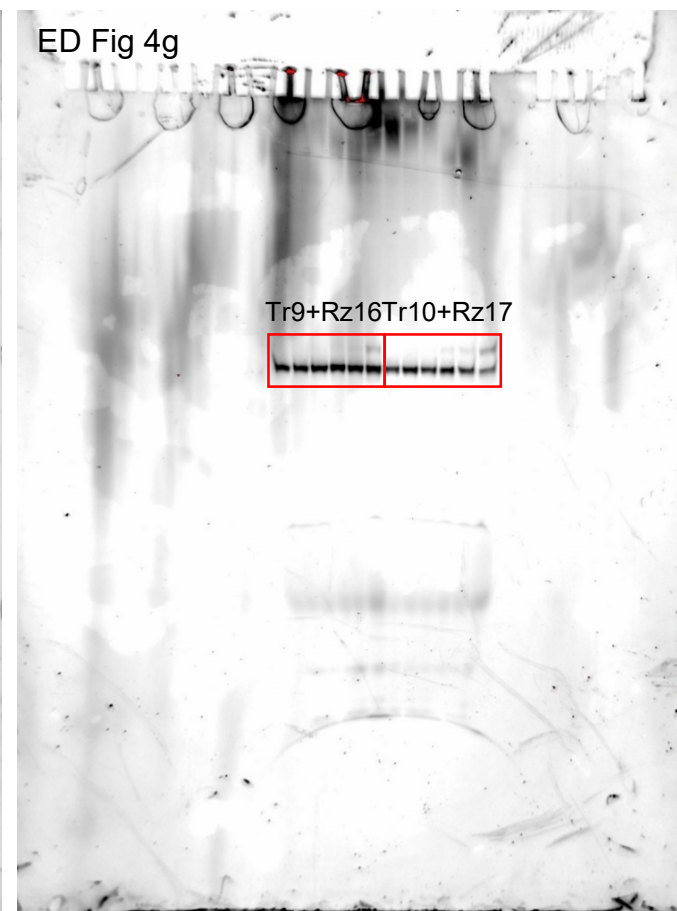

20% PAGE, 20x30 cm, 35W, 1:00 h

## Source data for ED Fig 4 continued

ED Fig 4a      Fluorescent RNAs

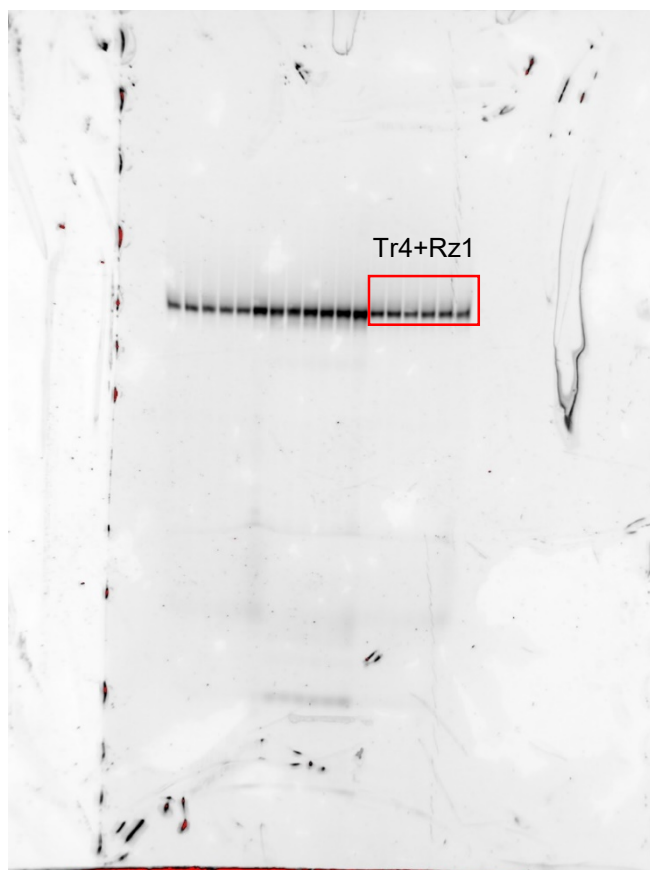

20% PAGE, 20x30 cm, 35W, 2:15 h

ED Fig 4a

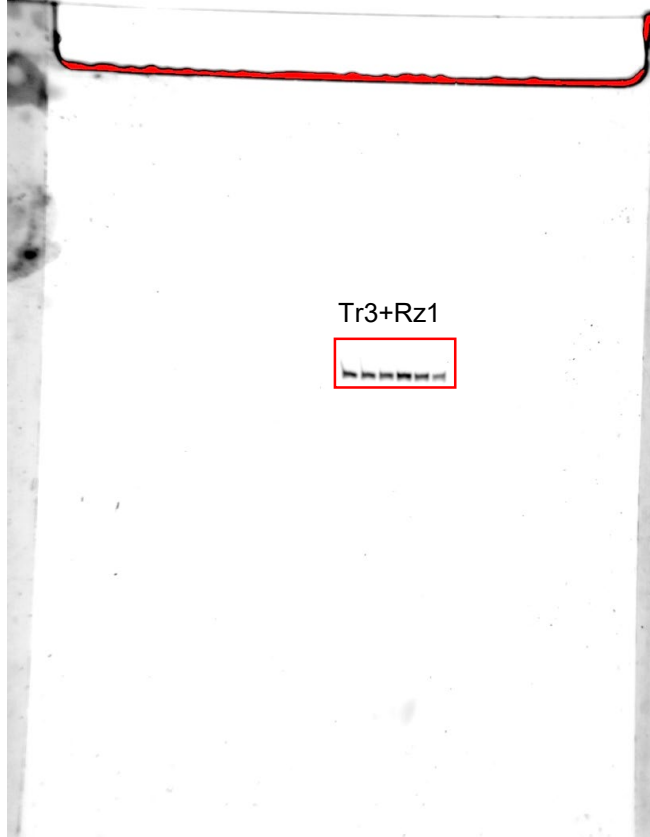

20% PAGE, 20x30 cm, 35W, 2:15 h

ED Fig 4d      5'-<sup>32</sup>P-labeled RNAs

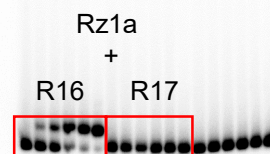

20% PAGE, 20x30 cm, 35W, 2:15 h  
(scan area 20x40 cm, edge of gel not visible)

## Source data for ED Fig 5c

R19+    R18+  
Rz23    Rz21

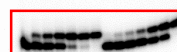

20% PAGE, 20x30 cm, 35W, 2:20 h
